# Supplementary material
Source: Springer Nature journal article supplement (https://www.springermedizin.de/resource/supplementary/12967_2006_126_MOESM2_ESM.pdf/9575758)

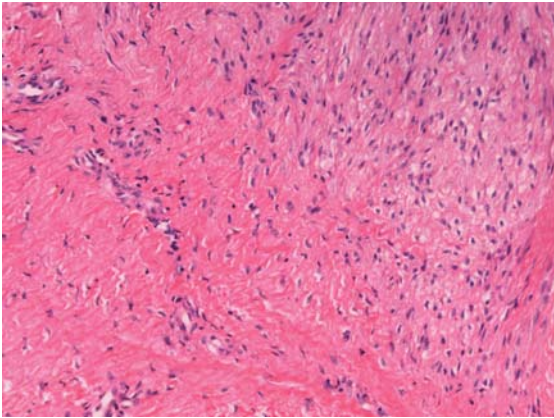

**A**

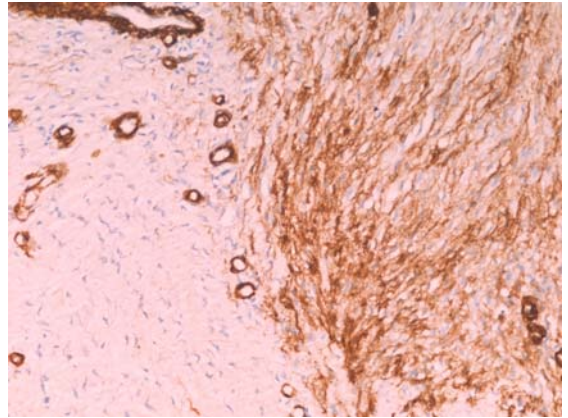

**B**

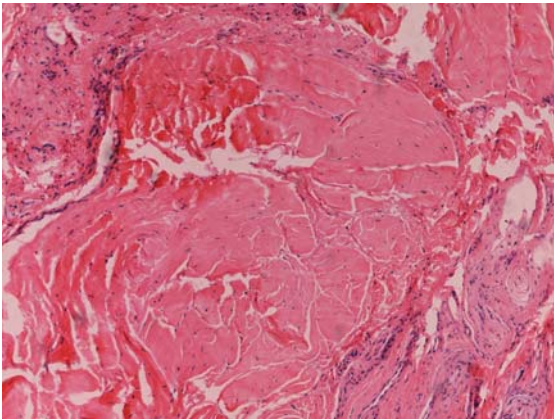

**C**

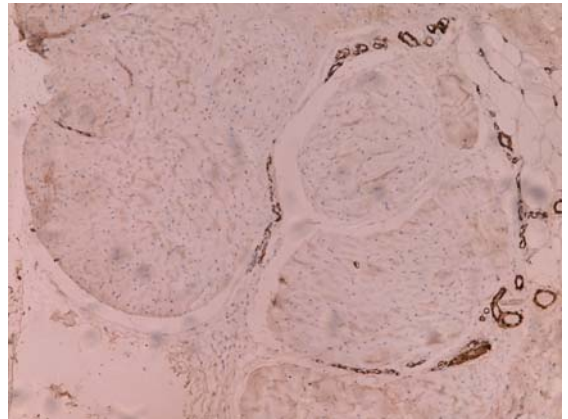

**D**

Supplement: MOESM2 [file 9575758]
